# Supplementary material for: Opposing Roles of S1P3 Receptors in Myocardial Function
Source: MDPI journal article supplement (doi:10.3390/cells9081770), 2020-07-24
Supplement: s1 [file s1]

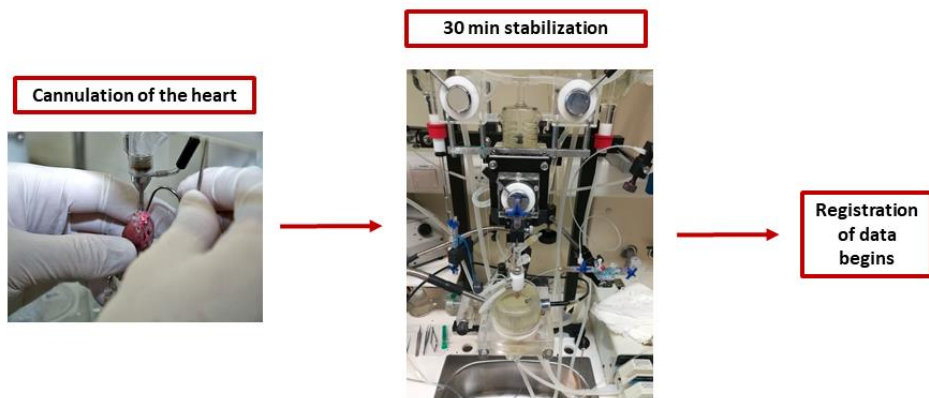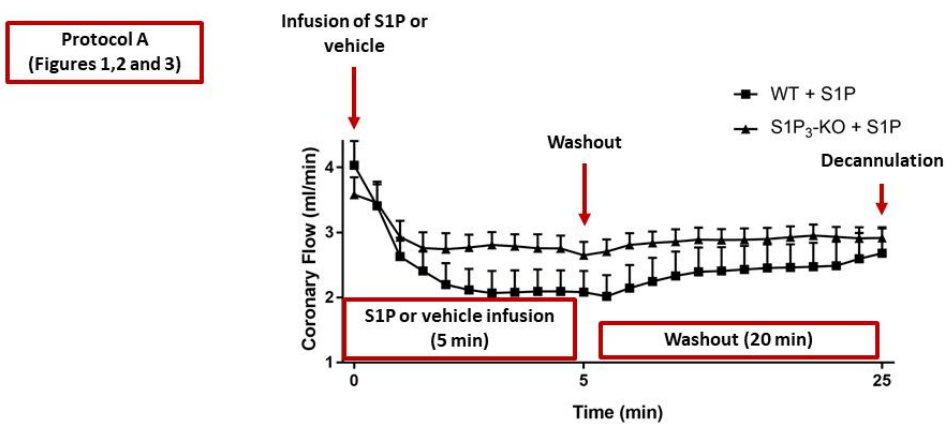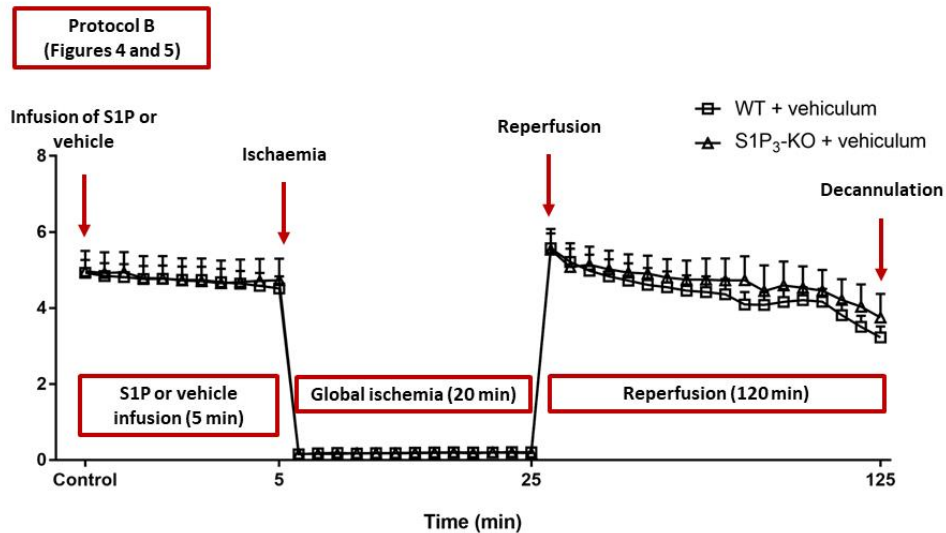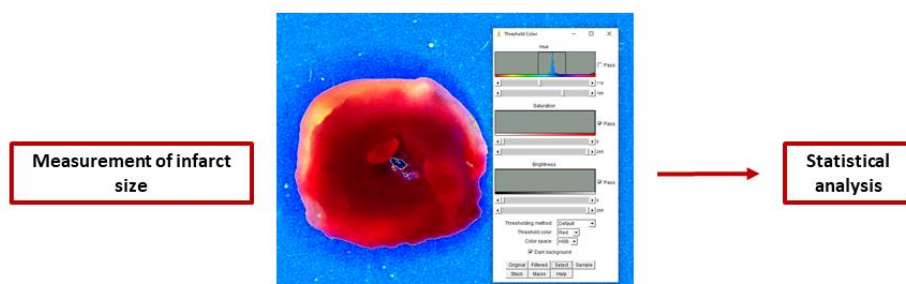

**Suppl. Figure 1. Experimental protocols of isolated heart experiments.** After cannulation, a 30-min stabilization period was allowed. Subsequently, baseline data were recorded and S1P or vehicle was infused to the perfusion line for 5 min. Afterwards, depending on the experiment, either a 20-min washout period (Protocol A) or a 20-min global ischemia caused by complete cessation of perfusion was applied. At the end of the ischemic period, perfusion was re-introduced and reperfusion was followed up for 2 h (Protocol B).

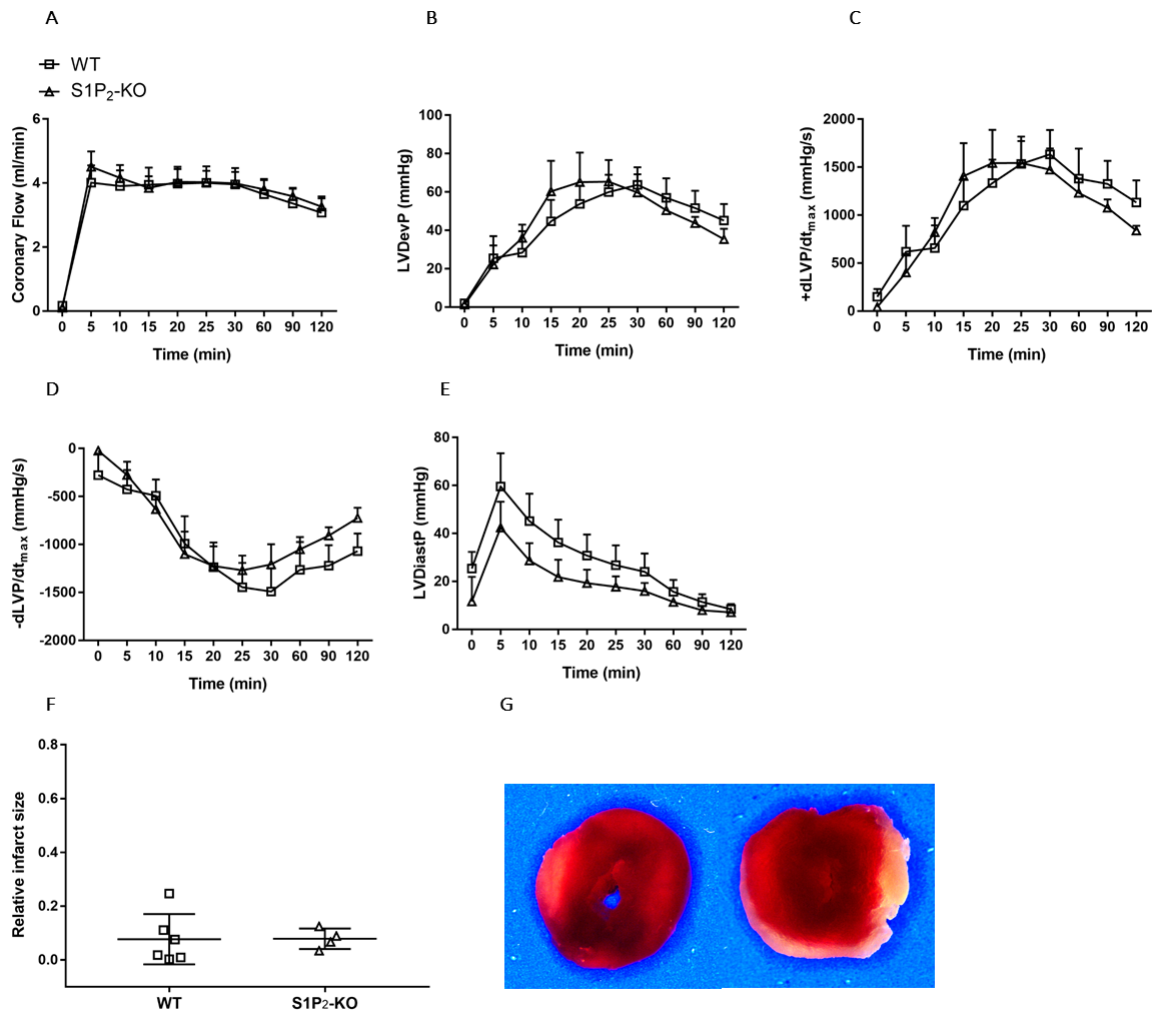

**Suppl. Figure 2.** Postischemic coronary flow (CF) (A), left ventricular developed pressure (LVDevP) (B), +dLVP/dt<sub>max</sub> (C), -dLVP/dt<sub>max</sub> (D) and left ventricular diastolic pressure (LVDiastP) (E) in isolated WT and S1P<sub>2</sub> knock-out (KO) mouse hearts. Vehicle was administered for 5 min to the perfusate before the induction of a 20-min ischemia followed by a 120-min reperfusion period. Relative infarct size (F) and representative sections (G) from hearts subjected to ischemia/reperfusion. Mean  $\pm$  SEM; n=6, 4; statistics: two-way repeated measurement ANOVA and Dunnett's *post hoc* test (A-E) and unpaired *t*-test (F).
